# Supplementary material for: Catalytically active ceria-supported cobalt–manganese oxide nanocatalysts for oxidation of carbon monoxide
Source: Royal Society of Chemistry journal article supplement (doi:10.1039/c7cp02004j), 2017-01-01
Supplement: c7cp02004j1.pdf [file c7cp02004j1.pdf]

*Supplementary Information for*

## Catalytically Active Ceria-Supported Cobalt-Manganese Oxide Nanocatalysts for Oxidation of Carbon Monoxide

*Xu Wang<sup>a,d</sup>, Lin-Ying Du<sup>b</sup>, Meng Du<sup>a,e</sup>, Chao Ma<sup>c,\*</sup>, Jie Zeng<sup>c</sup>, Chun-Jiang Jia<sup>b,\*</sup>, Rui Si<sup>a,\*</sup>*

<sup>a</sup> Shanghai Synchrotron Radiation Facility, Shanghai Institute of Applied Physics, Chinese Academy of Sciences, Shanghai 201204, China

<sup>b</sup> Key Laboratory for Colloid and Interface Chemistry, Key Laboratory of Special Aggregated Materials, School of Chemistry and Chemical Engineering, Shandong University, Jinan 250100, China

<sup>c</sup> Hefei National Laboratory for Physical Sciences at the Microscale, University of Science and Technology of China, Hefei, Anhui 230026, China

<sup>d</sup> University of Chinese Academy of Science, Beijing 10049, China

<sup>e</sup> Department of Chemistry, College of Science, Shanghai University, Shanghai 200444, China

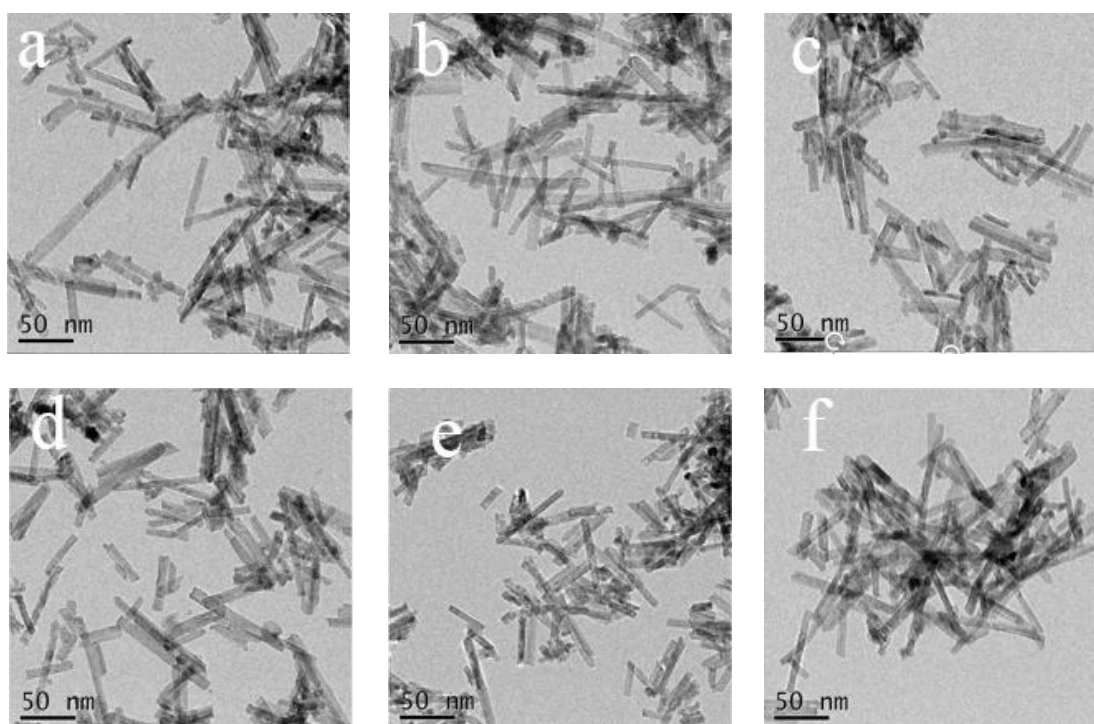

**Figure S1.** TEM images of fresh (a-c) and used (d-f) ceria-supported cobalt-manganese oxide samples: (a,d) CoO<sub>x</sub>/CeO<sub>2</sub>; (b,e) CoMnO<sub>x</sub>/CeO<sub>2</sub>; (c,f) MnO<sub>x</sub>/CeO<sub>2</sub>.

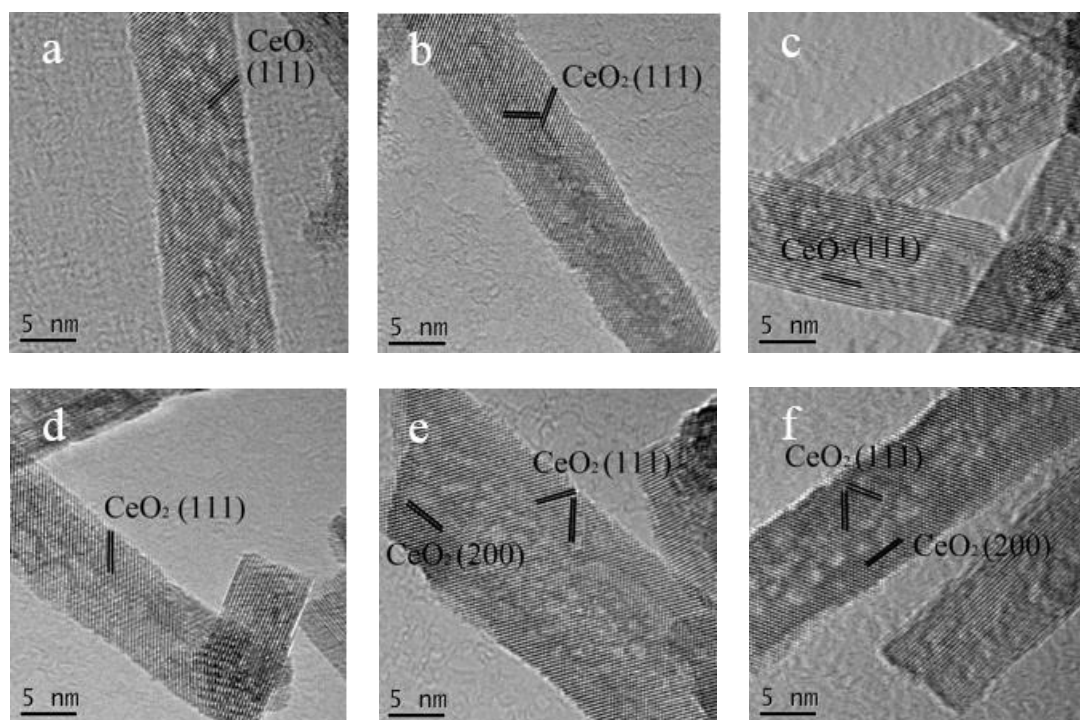

**Figure S2.** HRTEM images of fresh (a-c) and used (d-f) ceria-supported cobalt-manganese oxide samples: (a,d) CoO<sub>x</sub>/CeO<sub>2</sub>; (b,e) CoMnO<sub>x</sub>/CeO<sub>2</sub>; (c,f) MnO<sub>x</sub>/CeO<sub>2</sub>.
